# Supplementary material for: Roles of mitochondrial ROS and NLRP3 inflammasome in multiple ozone-induced lung inflammation and emphysema
Source: Respir Res. 2018 Nov 22;19:230. doi: 10.1186/s12931-018-0931-8 (PMC6249848; doi:10.1186/s12931-018-0931-8)
Supplement: Supplementary file 1 — The effect of 3-week treatment with MitoTEMPO or VX765 on air-exposed mice. (DOC 5569 kb) [file 12931_2018_931_MOESM1_ESM.doc]

**Additional file 1**

**Roles of mitochondrial ROS and NLRP3 inflammasome in multiple ozone-induced lung inflammation and emphysema**

Feng Li1,2*, Mengmeng Xu1*,Muyun Wang1*, Lei Wang2, Hanying Wang2, Hai Zhang1,Yuqing Chen1, Jicheng Gong3,4, Junfeng (Jim) Zhang3,5, Ian M. Adcock5,6, Kian Fan Chung5, Xin Zhou1＃

The effect of MitoTEMPO and VX765 on lung function, lung inflammatory response, and expression and activity of NLRP3 inflammasome

**Methods**

**mice and inhibitor administration**

Eight-ten weeks male C57/BL6 mice (Shanghai Super- B&K Laboratory Animal Corp. Ltd, Shanghai, China) were housed in specific-pathogen-free (SPF) conditions with food and water supplied ad libitum. Mice were exposed filtered air for 3 hours, twice a week over 3 weeks. Phosphate buffered saline (PBS) and MitoTEMPO (mtROS inhibitor, 20mg/kg, Sigma-Aldrich, St. Louis, MO, USA) dissolved in PBS and administered intraperitoneally to mice, while VX765 (caspase-1 inhibitor,100mg/kg, Selleck, Houston, TX, USA) was dissolved in distilled water containing 0.5% sodium salt of carboxy methylellucose and 0.1% Tween-80 and administered intragastrically to mice one hour before each exposure twice a week for 3 weeks.

**Lung function**

After anesthesia with injection of ketamine (100mg/kg) and xylazine (10mg/kg) , mice were tracheostomized and placed in a whole-body plethysmograph (EMMS, Hants, UK) with a ventilator to measure inspiratory capacity (IC), functional residual capacity (FRC), total lung capacity (TLC), forced vital capacity (FVC), forced expiratory volume in first 25 and 50 milliseconds of exhalation (FEV25, FEV50) and chord compliance (Cchord).

**Measurement of bronchoalveolar lavage fluid**

Following terminal anaesthesia, bronchoalveolar lavage (BAL) fluid collected. Total cell counts were determined using a hemocytometer, and differential cell counts from cytospin preparations were measured under a microscope. Levels of chemokine (C-X-C motif) ligand 1 (CXCL1, KC), interleukin-6 (IL-6) and interleukin-1β (IL-1β) in the BAL fluid were measured using enzyme-linked immunosorbent assay kits (R&D systems, China Co. Ltd, Shanghai, China) according to manufacturers' instructions.

**Histological analysis**

The left lung was inflated with 4% paraformaldehyde under 25cm of water pressure and then embedded in paraffin. 5µm sections were cut and stained with haematoxylin and eosin (H&E).Lung inflammatory response was scored on a 0–3 scale as previously described: 0, no inflammation was detectable; 1, occasional cuffing with inflammatory cells; 2, most bronchi or vessels were surrounded by a thin layer (one to five cells thick) of inflammatory cells; 3, most bronchi or vessels were surrounded by a thick layer (more than five cells thick) of inflammatory cells. Lung inflammation was defined as the average of the peribronchial and perivascular inflammation scores.

**Lung caspase-1 activity**

The levels of caspase-1 activity in mouse lung tissue were detected using a commercial assay kit (Beyotime) and measured at 405 nm by a microplate reader following the manufacturer’s instructions.

**Western blot**

Equal amounts lung homogenate were separated by 10%SDS-PAGE (Beyotime) and electrophoretically transferred to nitrocellulose membranes. The membranes were blocked, then incubated with primary antibodies against NLRP3 (CST), caspase-1 (Abcam) and GAPDH (CST) for blot detection. The density was quantitated using a densitometer.

Results:

1. Lung Function

Compared with PBS-treated air-exposed mice, treatment with MitoTEMPO or VX765 for 3 weeks did not significantly affect lung volume parameters (IC, FRC and TLC), compliance (Cchord) or airflow volume ratios (FEV25/FVC, FEV50/FVC) .

**

**

2. BAL cells, cytokines and inflammation scores

Compared with PBS-treated air-exposed mice, treatment with MitoTEMPO or VX765 for 3 weeks did not significantly affect total cells and differential cell counts, or cytokines levels in BAL fluid and lung inflammation scores in air-exposed mice.





3. NLRP3, Caspase-1 expression and caspase-1 activity

Compared with PBS-treated air-exposed mice, treatment with MitoTEMPO or VX765 for 3 weeks did not significantly affect the expression of NLRP3 and caspase-1, or capase-1 activity in air-exposed mice.

**
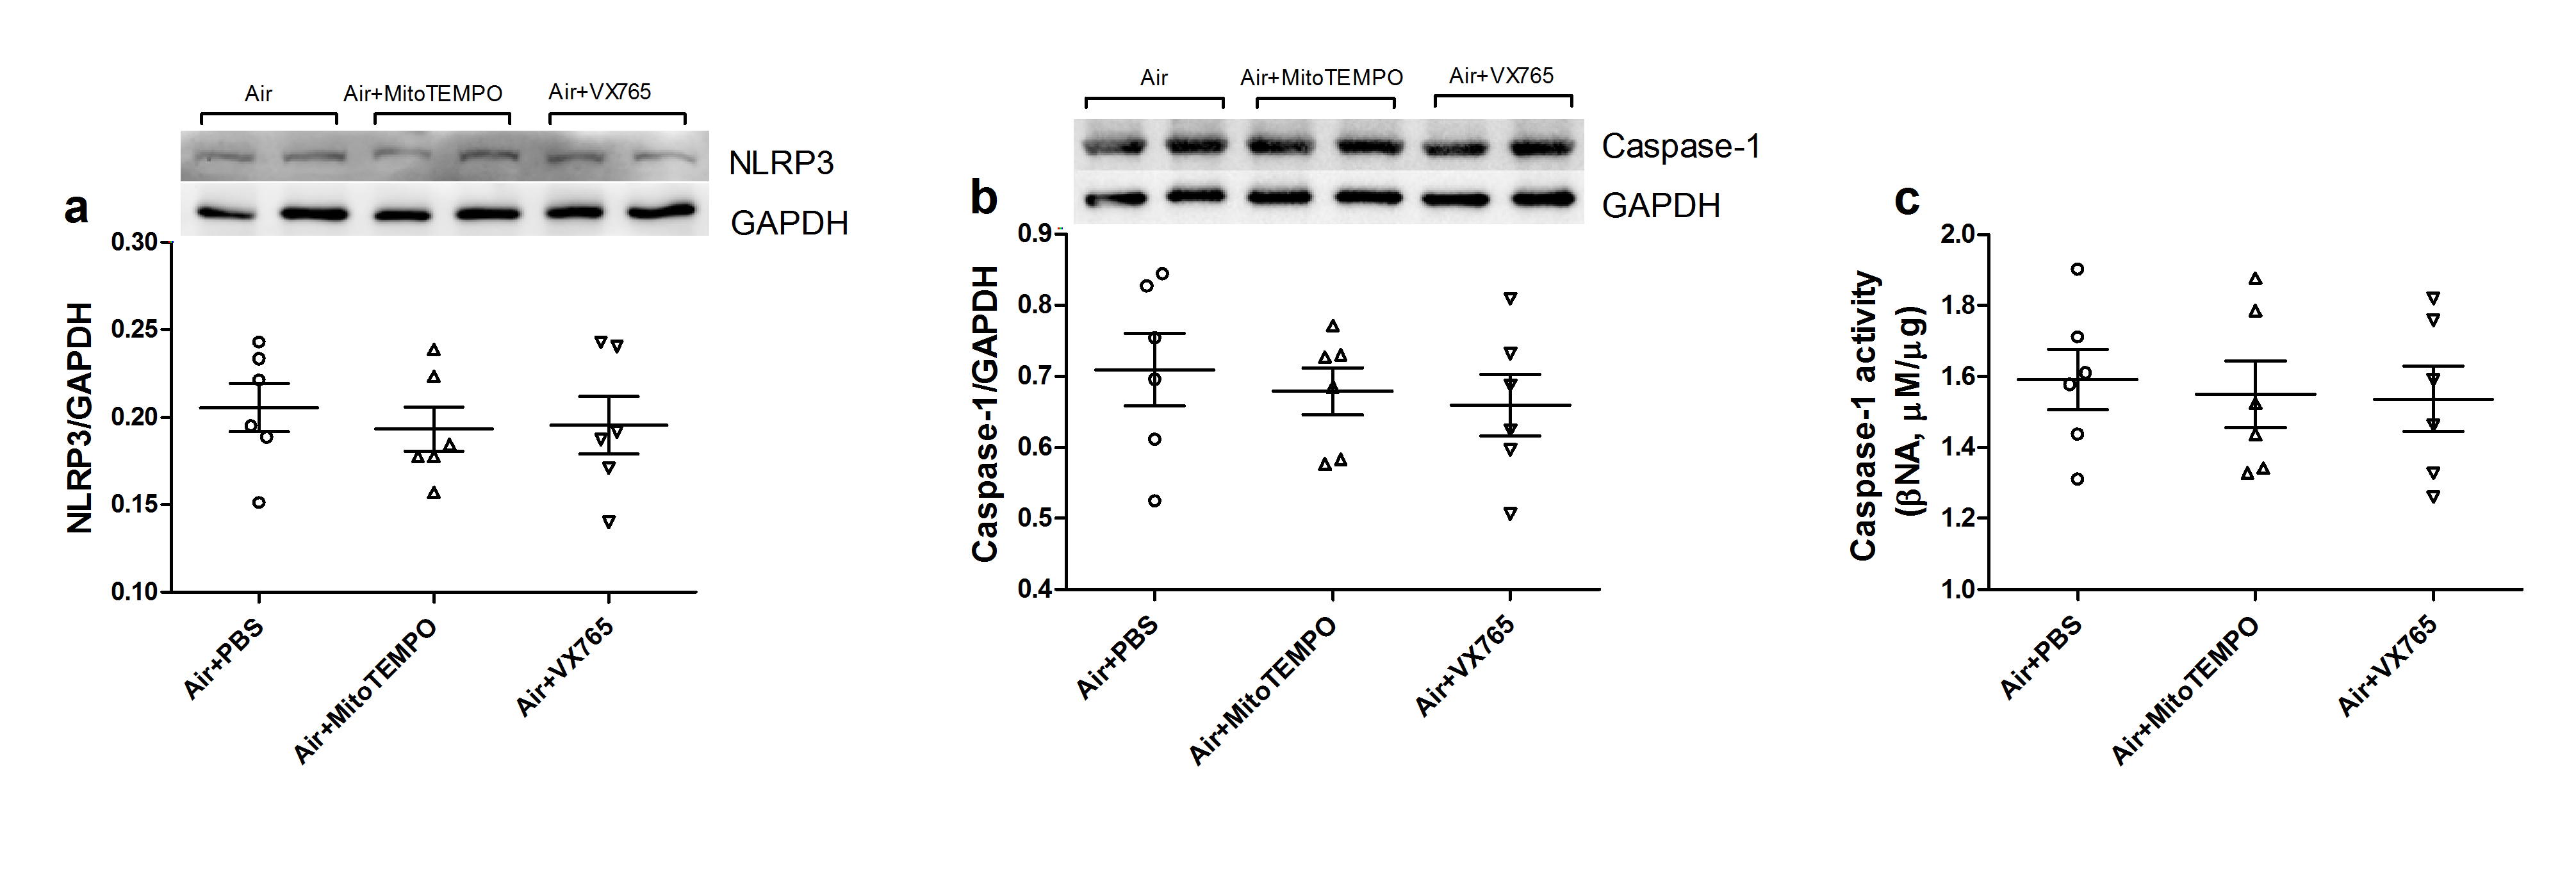
**
